# Supplementary material for: Augmented photoelectrochemical water reduction: influence of copper vacancies and hole-transport layer on CuBi2O4 photocathode
Source: Royal Society of Chemistry journal article supplement (doi:10.1039/d1ta09956f), 2022-01-01
Supplement: d1ta09956f1.pdf [file d1ta09956f1.pdf]

# Electronic Supplementary Information

## **Augmented photoelectrochemical water reduction: influence of copper vacancies and hole-transport layer on CuBi<sub>2</sub>O<sub>4</sub> photocathode**

Madhusudana Gopannagari,<sup>a</sup> D. Amaranatha Reddy,<sup>\*b</sup> Da Hye Hong,<sup>a</sup> K. Arun Joshi Reddy,<sup>a</sup> D. Praveen Kumar,<sup>a</sup> Hyun S. Ahn,<sup>a</sup> and Tae Kyu Kim<sup>\*a</sup>

<sup>a</sup>*Department of Chemistry, Yonsei University, Seoul 03722, Republic of Korea*

<sup>b</sup>*Department of Science, Indian Institute of Information Technology Design and Manufacturing, Kurnool, Andhra Pradesh 518007, India*

<sup>\*</sup>Corresponding Authors. Emails: [tkkim@yonsei.ac.kr](mailto:tkkim@yonsei.ac.kr) (T.K.K.) and [drreddy@iiitk.ac.in](mailto:drreddy@iiitk.ac.in) (D.A.R.)

→ Number of figures: 31

→ Number of tables: 8

→ Number of references: 20

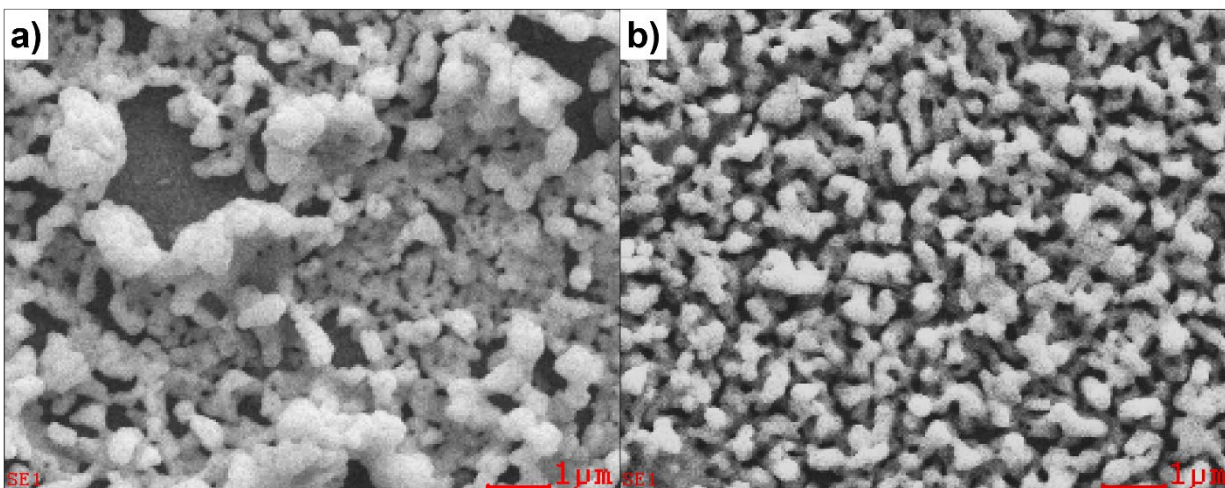

**Figure S1.** Top-view SEM images showing before heating process of (a) the unevenly distributed Cu/Bi film by direct electrodeposition and (b) evenly distributed Cu/Bi film by pulsed electrodeposition.

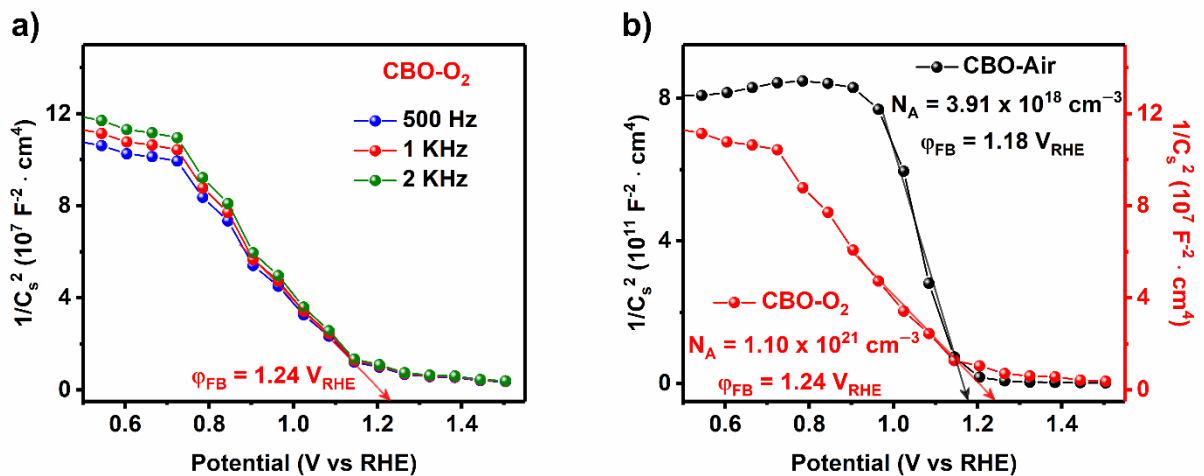

**Figure S2.** Mott-Schottky measurements. a) CBO- $\text{O}_2$  thin film performed at 0.5 kHz, 1 kHz and 2kHz. b) Comparison between pure  $\text{O}_2$  heating and conventional furnace heating CBO thin-films without HTLs measured at 1 kHz.

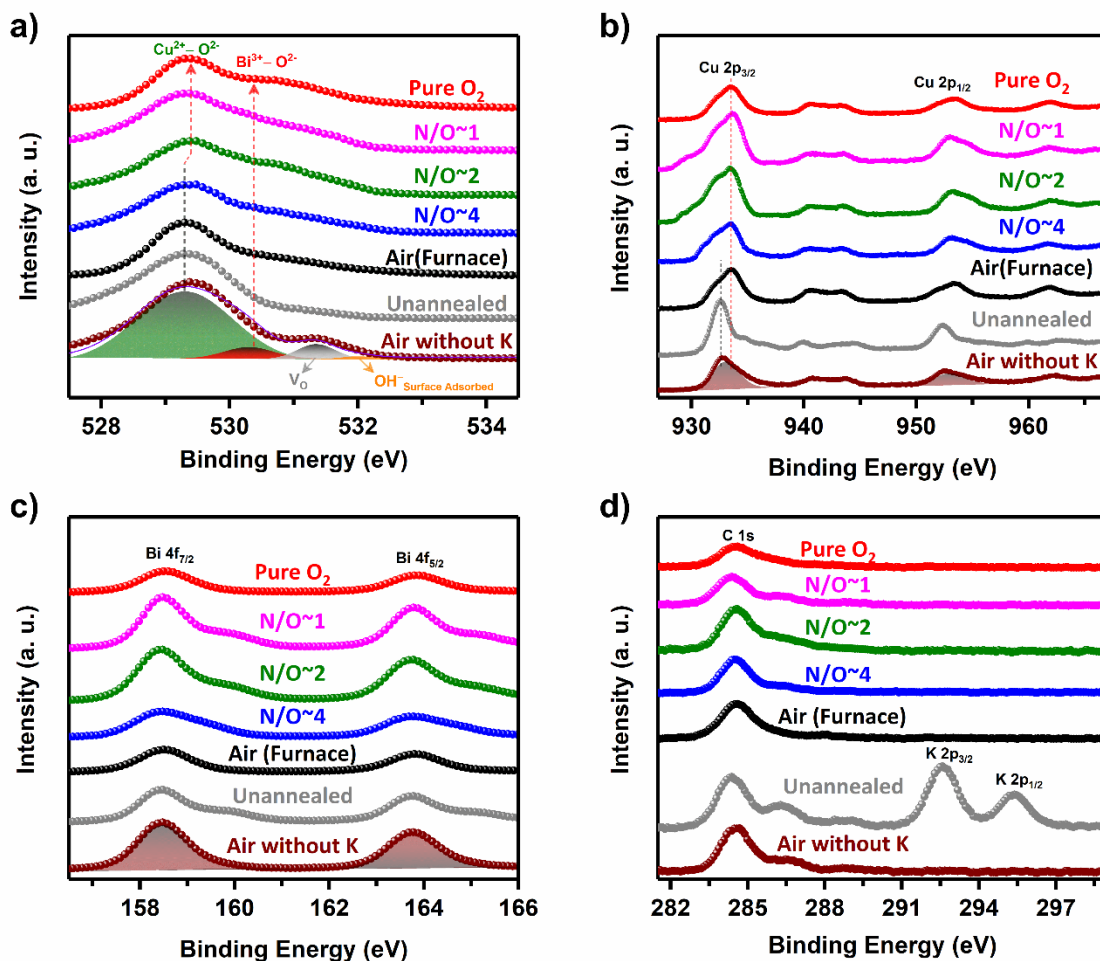

**Figure S3.** XPS data collected for the prepared CBO films. a) O 1s showing lattice oxygen bound to Cu and Bi, O-vacant sites ( $V_o$ ) and surface adsorbed  $OH^-$ . b) Cu 2p with strong satellite peaks corresponding to Cu(II) oxidation state except in unannealed (Cu(I) oxidation was observed). c) Bi 4f, and d) C 1s, K 2p (unannealed sample only).

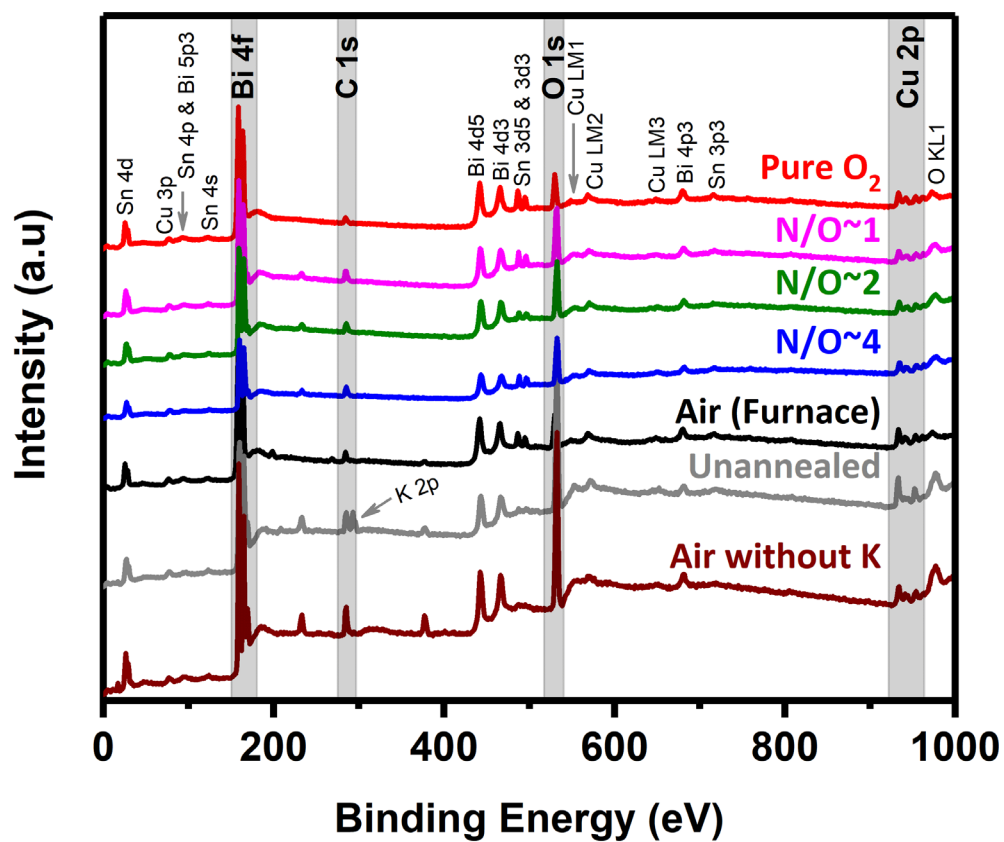

**Figure S4.** XPS survey spectrum for prepared CBO electrodes.

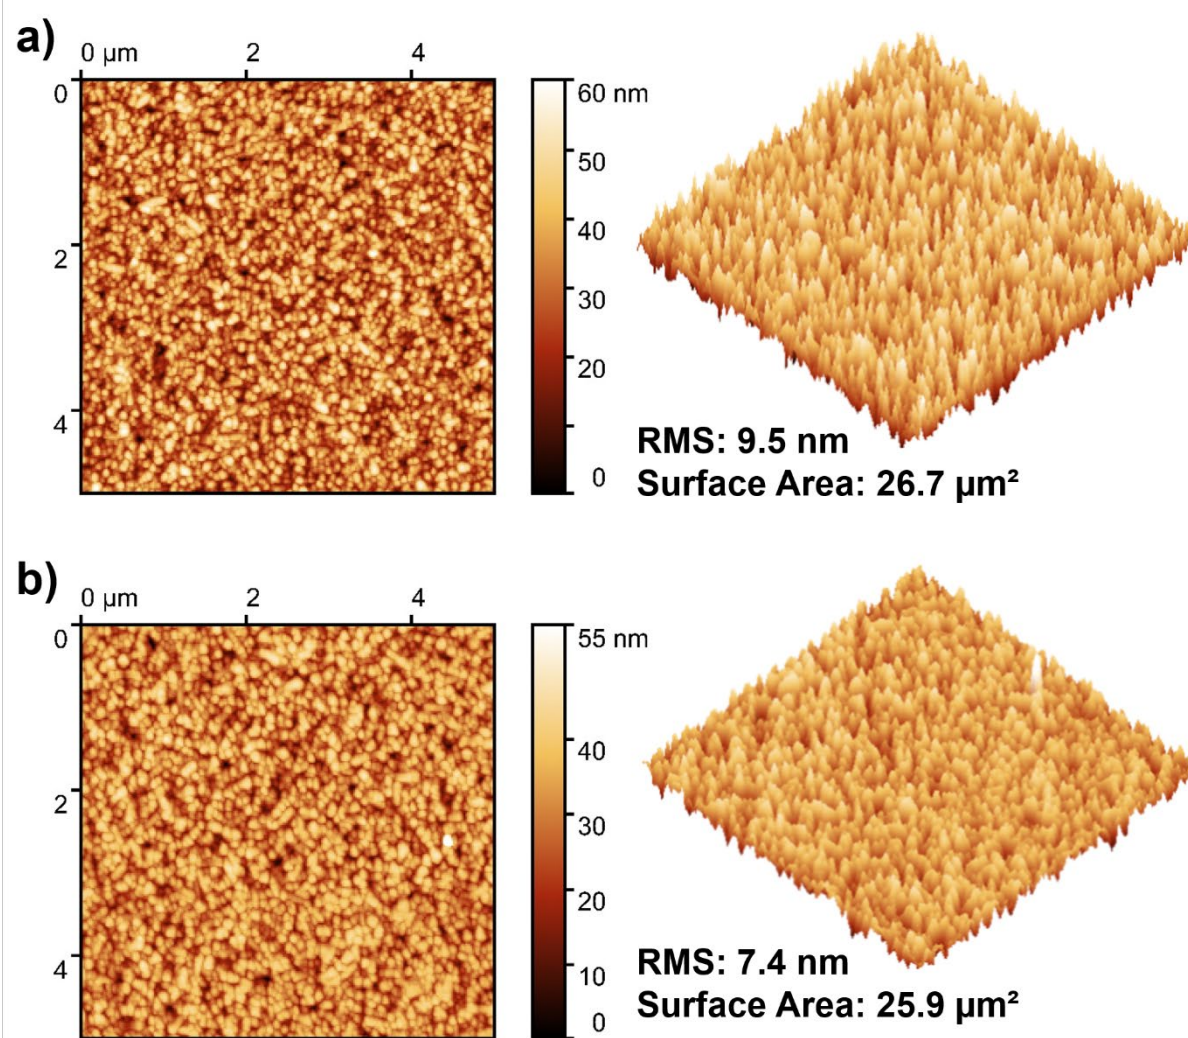

**Figure S5.** AFM height ( $5 \times 5 \mu m$ ) and 3D-AFM images of a) NiO<sub>x</sub> and b) Fe:NiO<sub>x</sub> HTLs on FTO substrates.

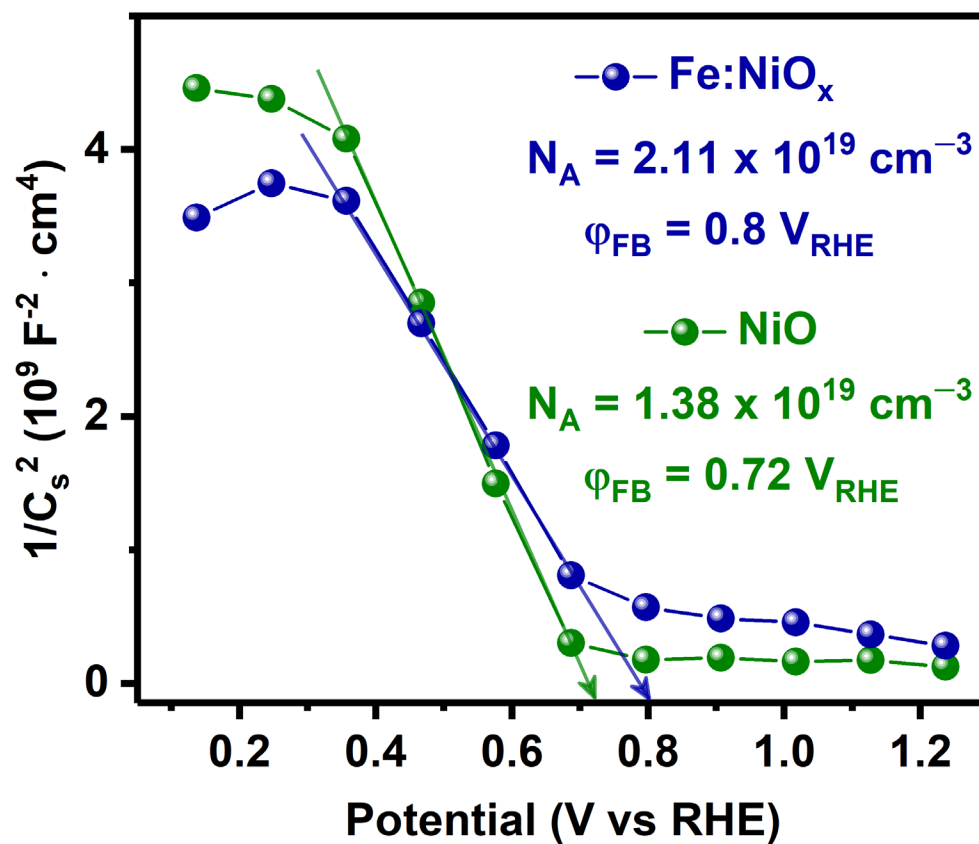

**Figure S6.** Mott-Schottky curves for hole-transport layer thin-films showing flat-band potentials and acceptor density.

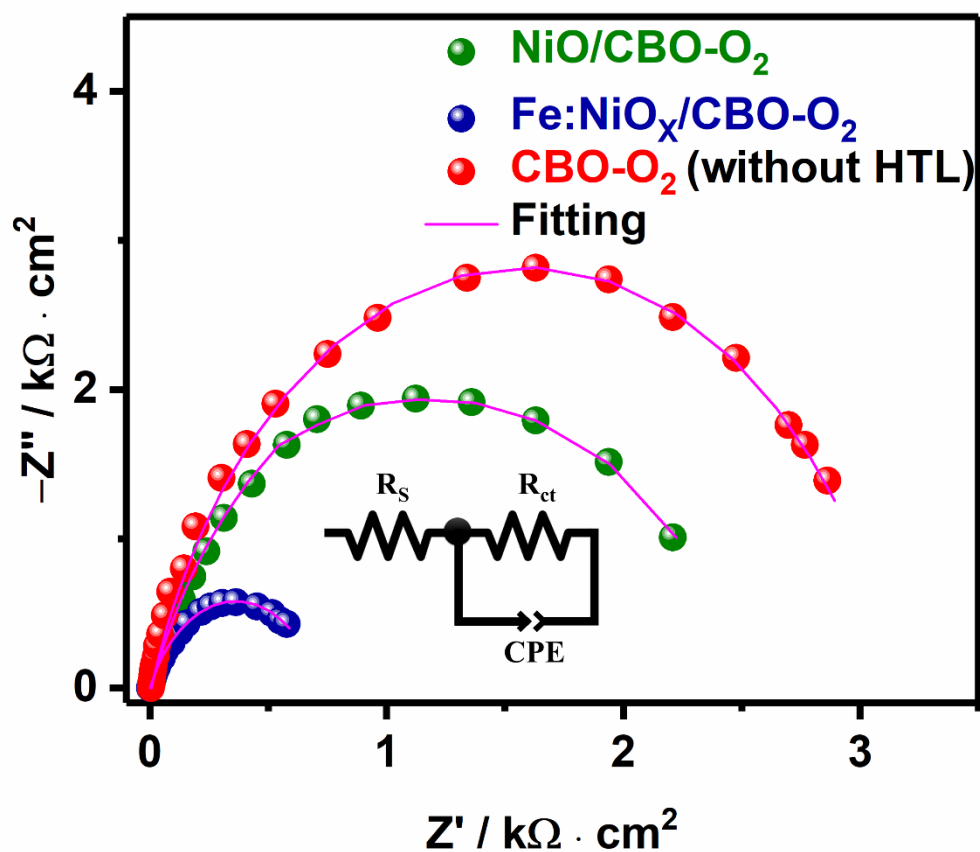

**Figure S7.** Electrochemical impedance spectroscopy measurements for CBO- $\text{O}_2$  photocathode, showing the comparison between bare NiO and Fe-doped  $\text{NiO}_x$  HTLs introduction.

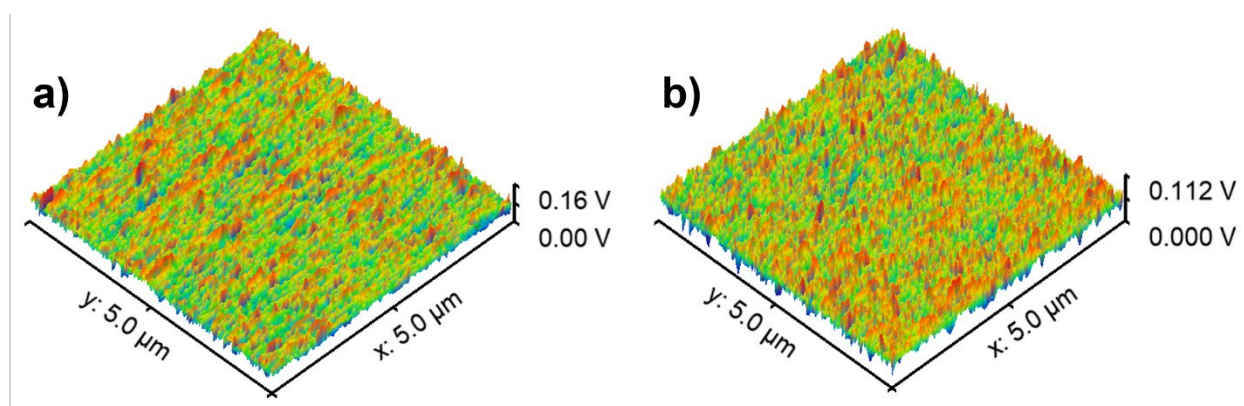

**Figure S8.** SKPM measurements of a)  $\text{NiO}_x$  and b)  $\text{Fe:NiO}_x$  HTLs on the FTO substrate.

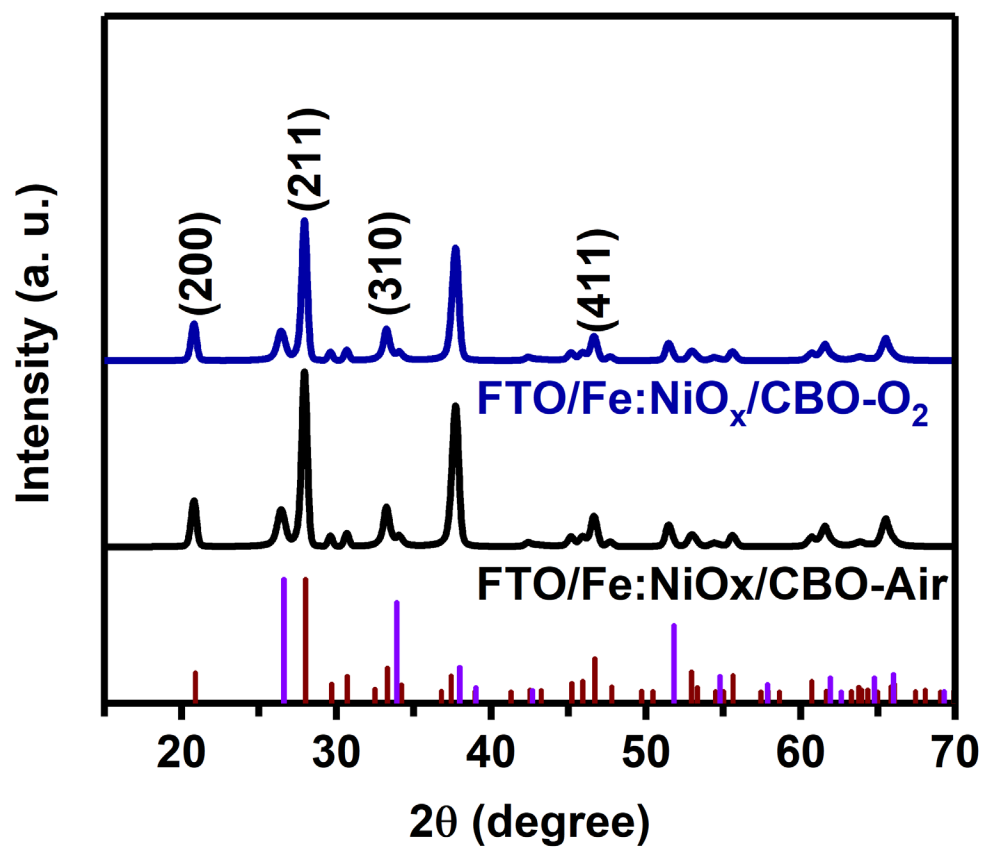

**Figure S9.** XRD patterns of CBO-Air and CBO-O<sub>2</sub> photocathodes deposited on Fe-doped NiO<sub>x</sub> HTL.

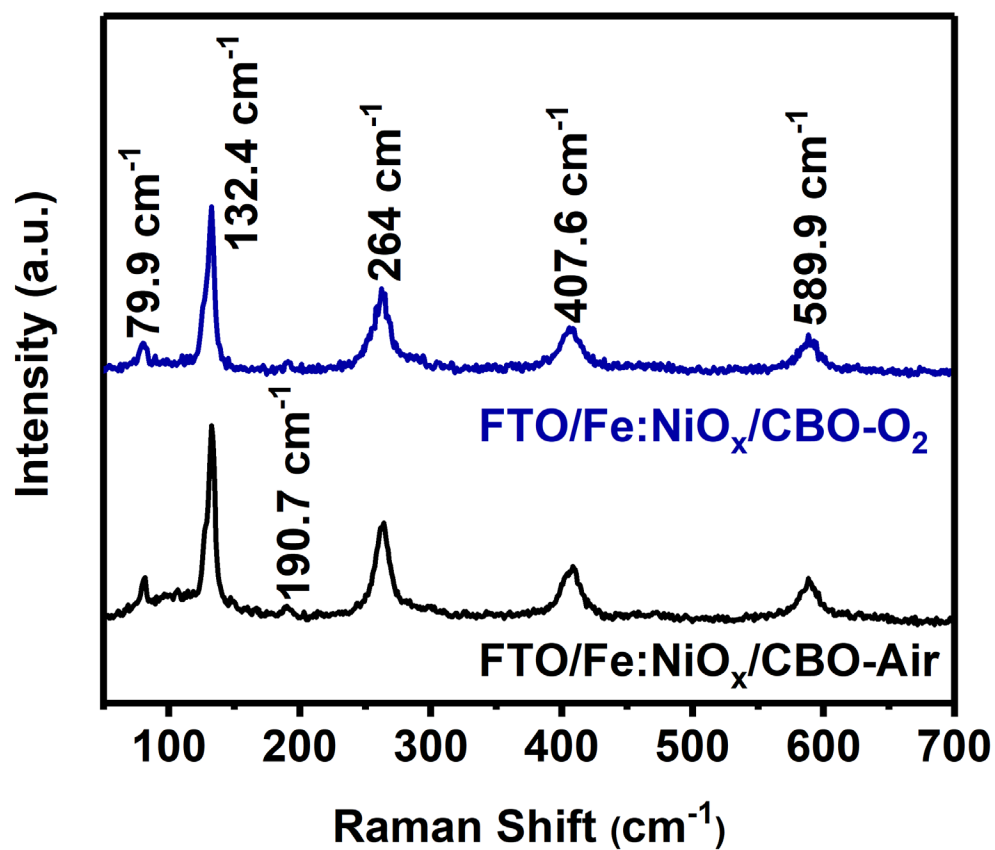

**Figure S10.** Raman spectra for CBO-Air and CBO-O<sub>2</sub> photocathodes deposited on Fe-doped NiO<sub>x</sub> HTL.

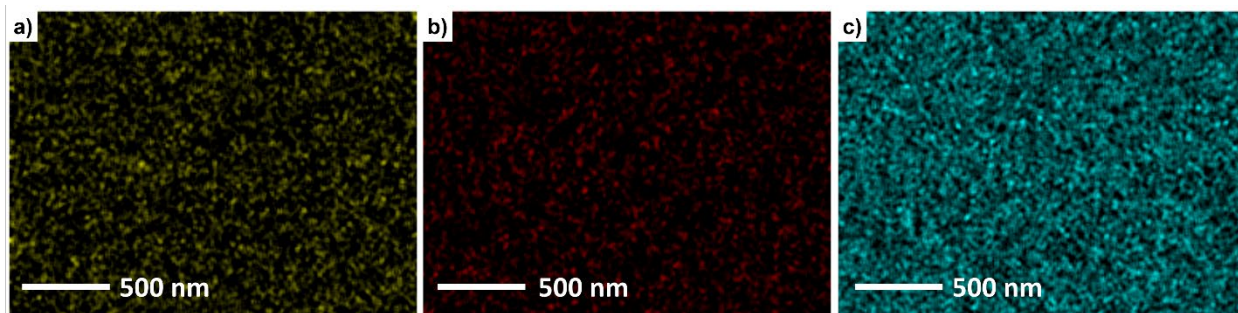

**Figure S11.** EDS mapping images of Fe:NiO<sub>x</sub>-HTL deposited on FTO, showing the elemental distributions of (a) Ni, (b) Fe, and (c) O.

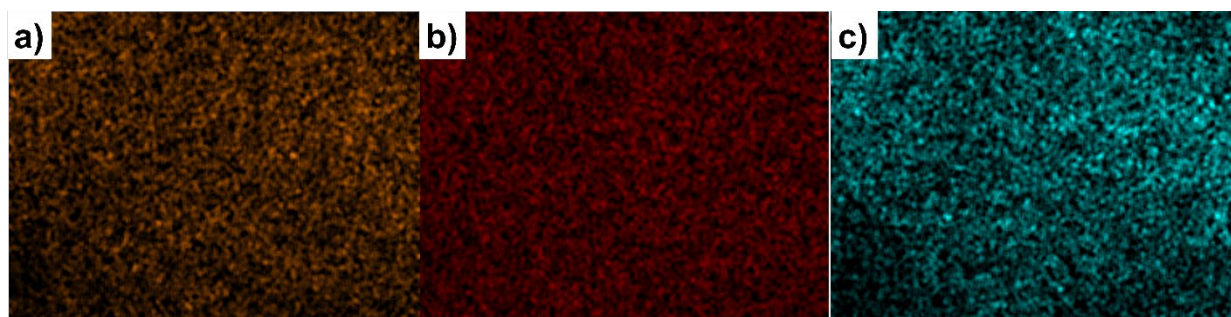

**Figure S12.** EDS mapping images of CBO-Air, showing the elemental distributions of (a) Cu, (b) Bi, and (c) O.

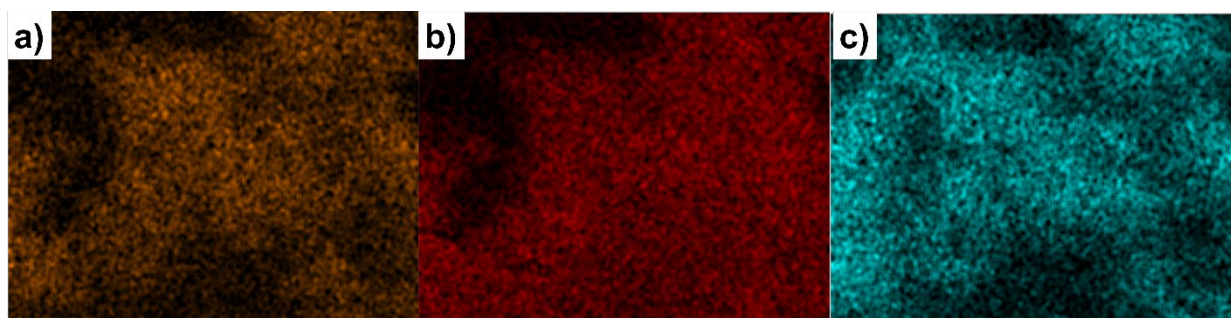

**Figure S13.** EDS mapping images of CBO-O<sub>2</sub>, showing the elemental distributions of (a) Cu, (b) Bi, and (c) O.

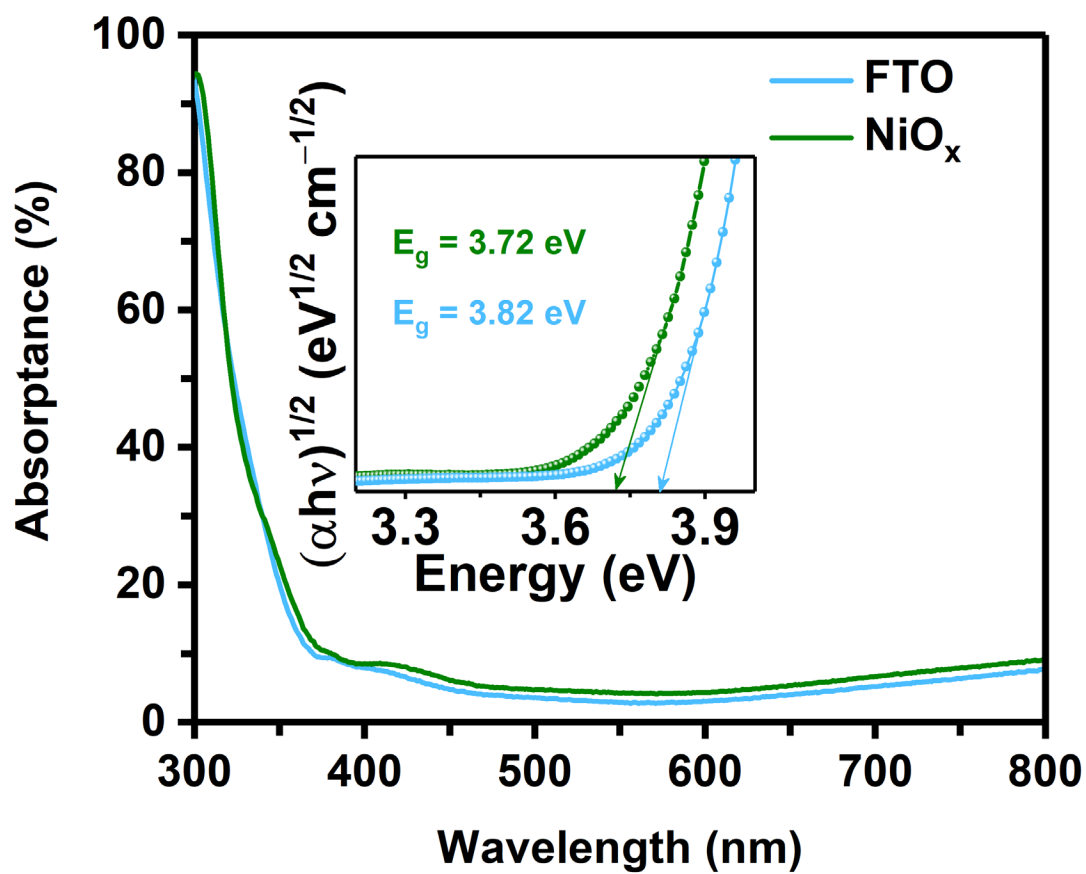

**Figure S14.** Absorbance of a bare FTO substrate and pristine NiO<sub>x</sub>; comparison is shown as a reference.

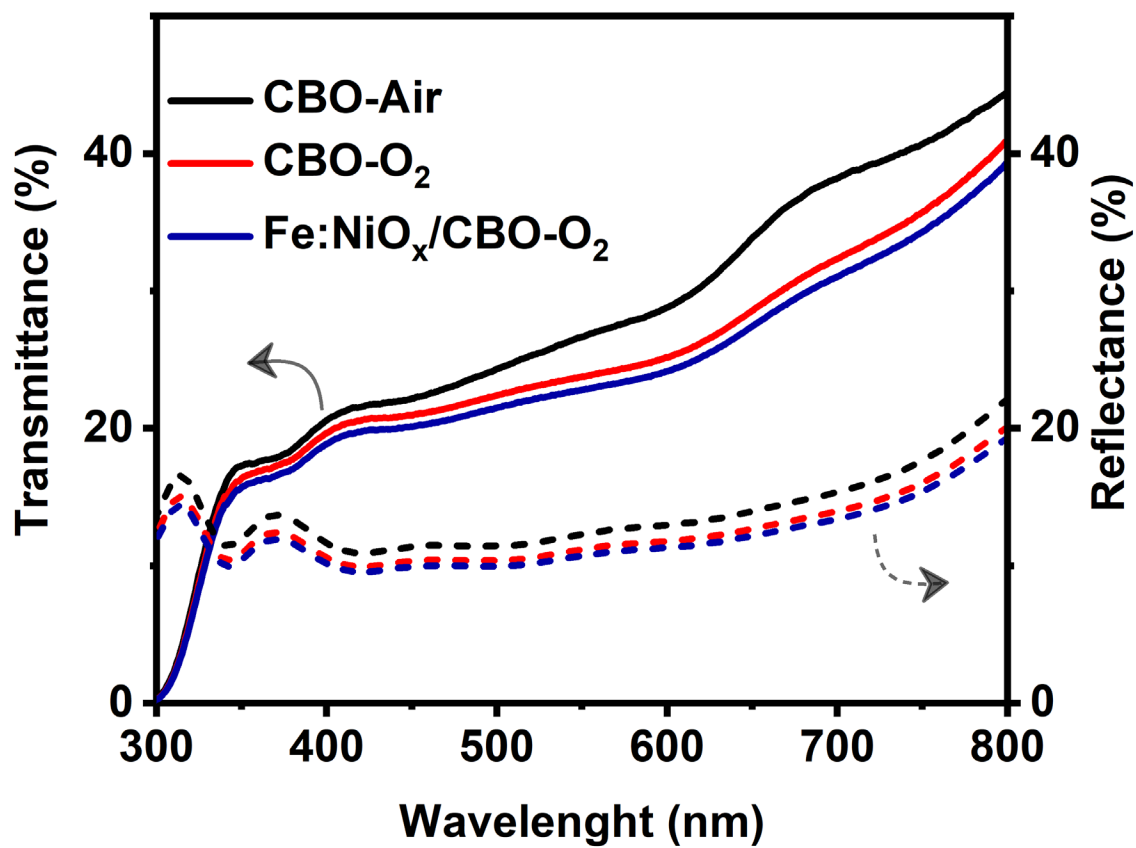

**Figure S15.** Transmittance and reflectance of prepared CBO photoelectrodes, compared with Fe-NiO<sub>x</sub>/CBO-O<sub>2</sub> photoelectrode.

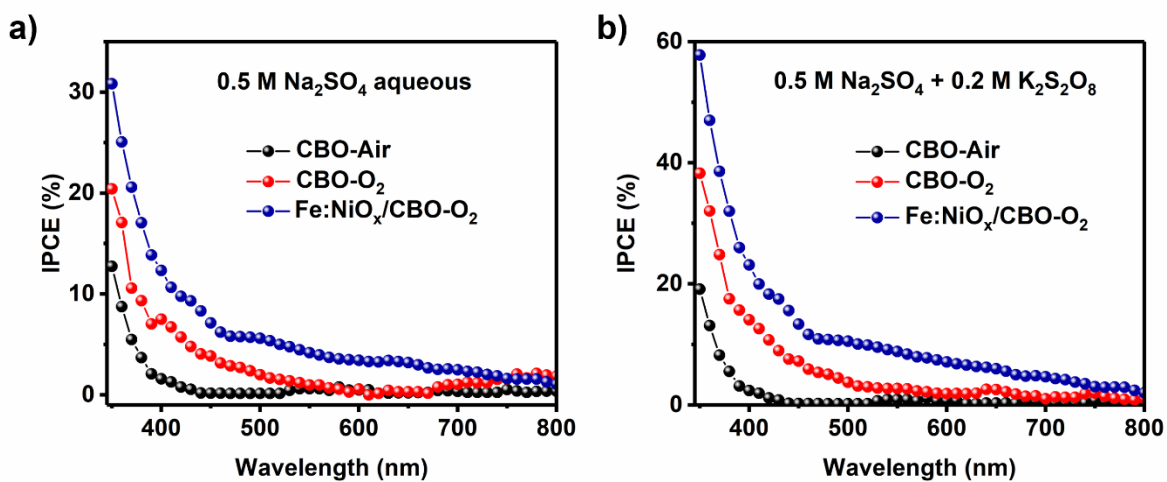

**Figure S16.** Incident photon-to-current efficiency (IPCE) measurements of CBO-Air, CBO-O<sub>2</sub> and Fe:NiO<sub>x</sub>/CBO-O<sub>2</sub> photocathodes in a) 0.5 M Na<sub>2</sub>SO<sub>4</sub> aqueous and b) in the presence of K<sub>2</sub>S<sub>2</sub>O<sub>8</sub> in the electrolyte as an electron scavenger.

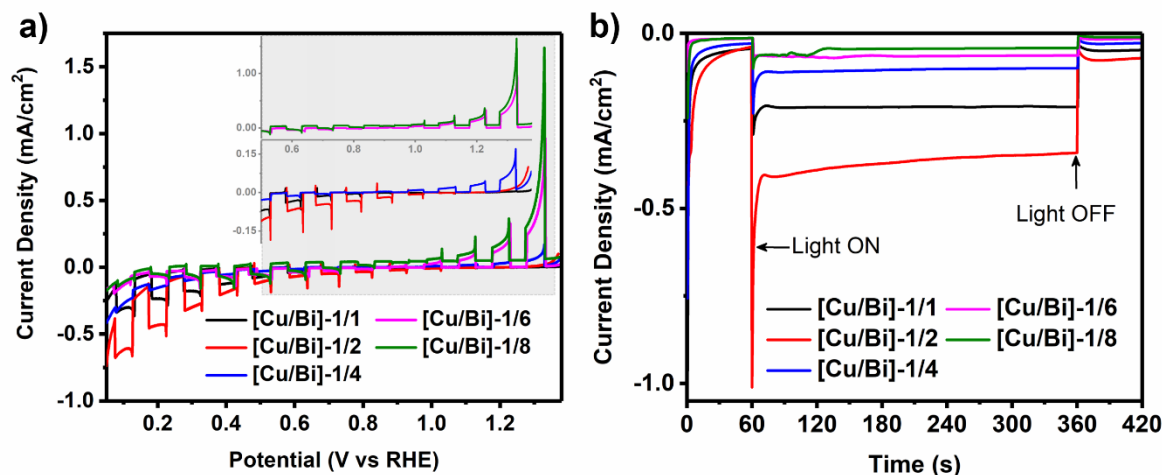

**Figure S17.** Cu:Bi molar ratio of FTO/CBO-Air photoelectrodes. a) Chopped LSV profile and b) photocurrent density vs. time profile at 0.2 V<sub>RHE</sub> applied constant potential under dark and light conditions. Inset in a) shows the conventional furnace heating CBO electrodes with lowering the Cu-to-Bi ratio content, which leads to an increase in anodic photocurrent at the water oxidation potential for [Cu/Bi]-1/4 (blue), [Cu/Bi]-1/6 (pink) and [Cu/Bi]-1/8 (green) photocathodes.

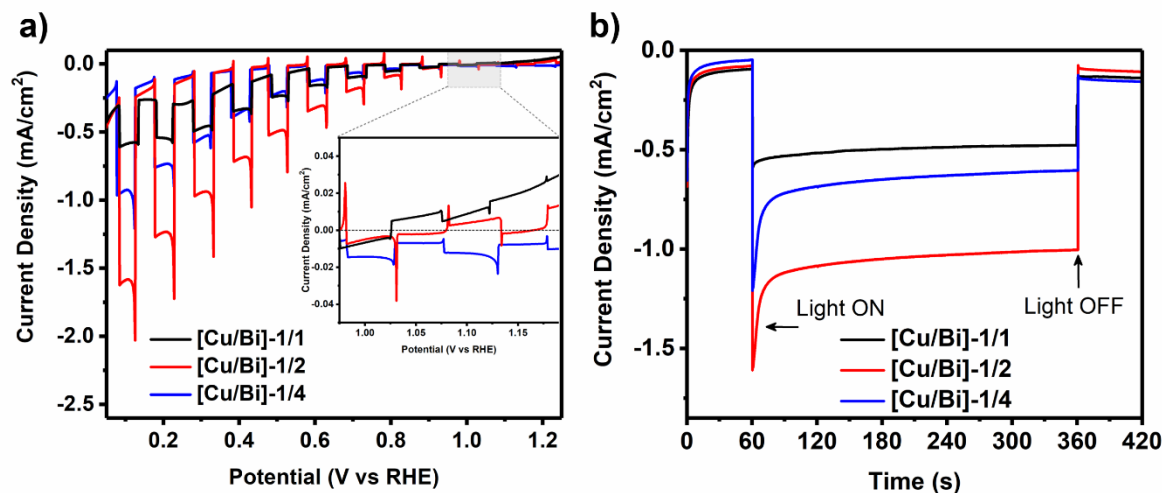

**Figure S18.** Cu:Bi molar ratio of FTO/CBO-O<sub>2</sub> photoelectrodes. a) Chopped LSV profile and b) photocurrent density vs. time profile at 0.2 V<sub>RHE</sub> constant potentials applied under dark and light conditions. Inset a) shows the onset potentials.

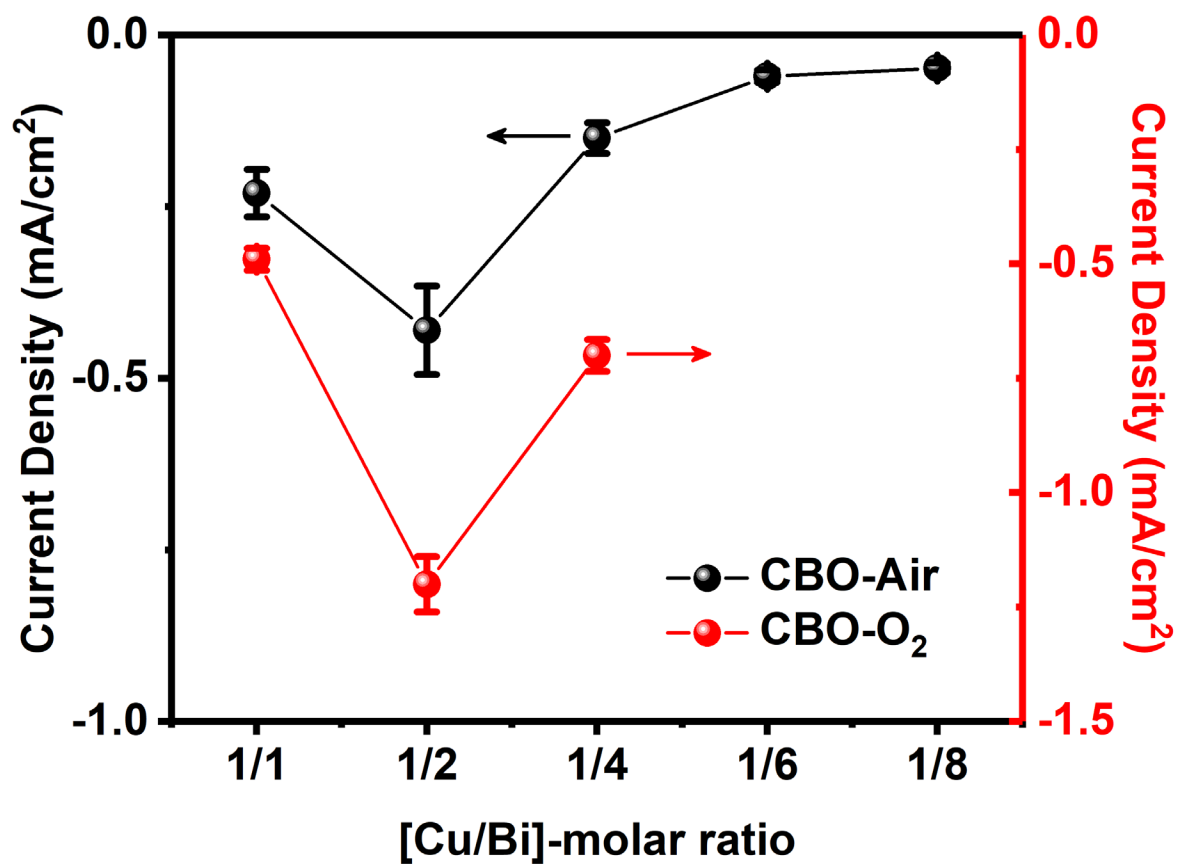

**Figure S19.** Photocurrent density at 0.2 V<sub>RHE</sub> applied potential vs. Cu-to-Bi molar ratio of FTO/CBO-O<sub>2</sub> and FTO/CBO-Air photoelectrodes.

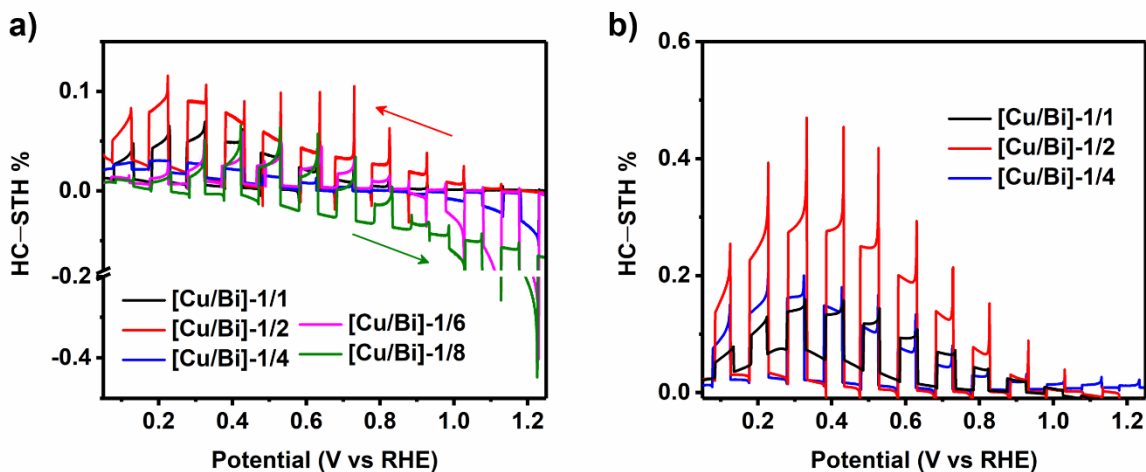

**Figure S20.** Comparison of HC-STH efficiency calculated from chopped LSV measurements for Cu-to-Bi molar ratio deposition on FTO substrate, a) Air and b) pure O<sub>2</sub> heat-treatment.

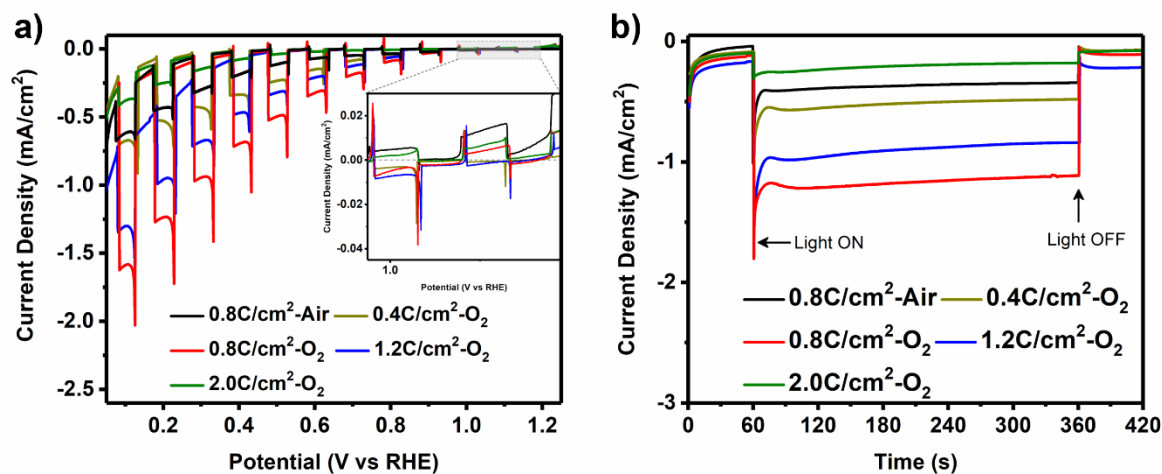

**Figure S21.** CBO-O<sub>2</sub> electrode pulsed electrodeposition charge limit: a) chopped LSV and b) transient photocurrent densities at 0.2 V<sub>RHE</sub> applied potential under dark and light condition. For comparison CBO-Air electrode prepared with 0.8 C/cm<sup>2</sup> is included. Inset (a) shows the recorded onset potentials.

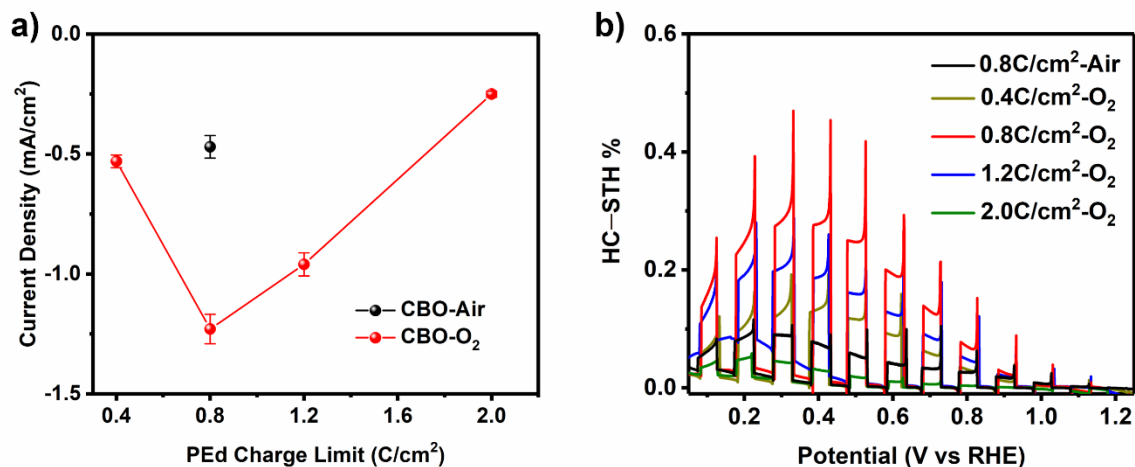

**Figure S22.** a) PEd charge limit vs. photocurrent density at 0.2  $V_{\text{RHE}}$ . b) HC-STH efficiency with respect to applied potential profiles of CBO-O<sub>2</sub> photocathodes and comparison with CBO-Air (C-limit 0.8 C/cm<sup>2</sup>) photocathode.

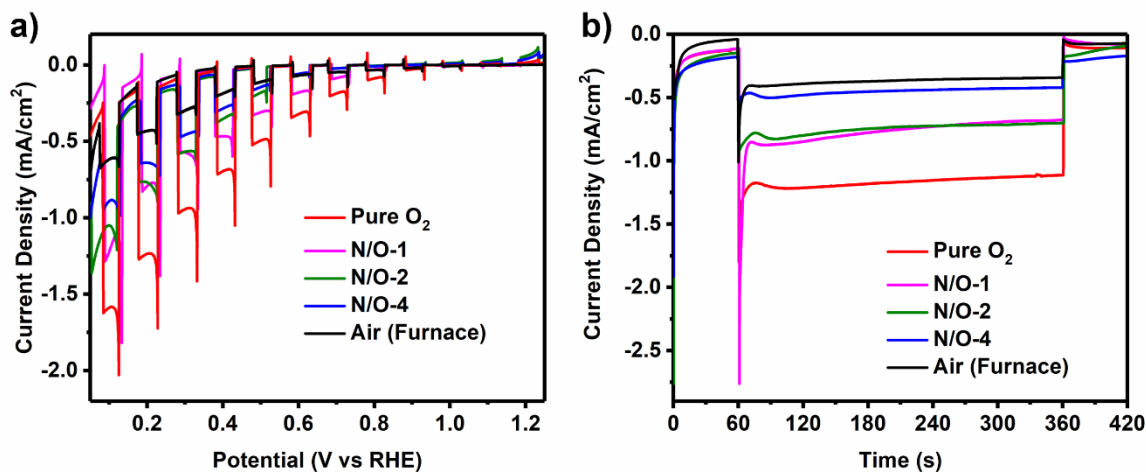

**Figure S23.** Different carrier gas heat-treated CBO electrodes: a) chopped LSV curves and b) transient photocurrent densities at 0.2  $V_{\text{RHE}}$  applied potential under dark and light condition. Comparison with conventional furnace heating CBO-Air electrode is displayed, showing the parallel performance with N/O-4 electrode, which is considered as air environment in the tube furnace.

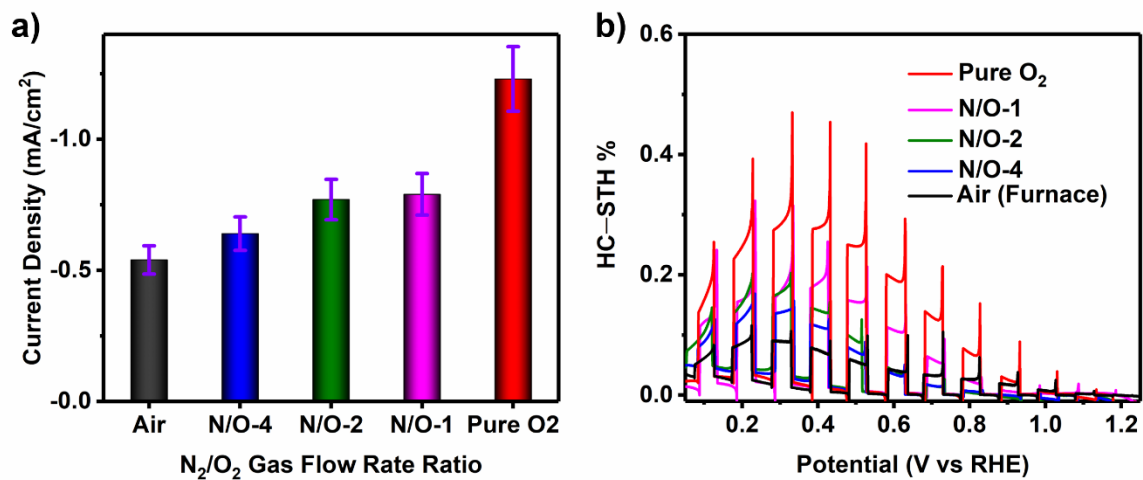

**Figure S24.** a) Photocurrent densities comparison at 0.2 V<sub>RHE</sub> applied potential of different carrier gas heat-treated CBO electrodes. b) Respective HC-STH efficiency calculation from the LSV curves. Comparison CBO-Air photocathode is included.

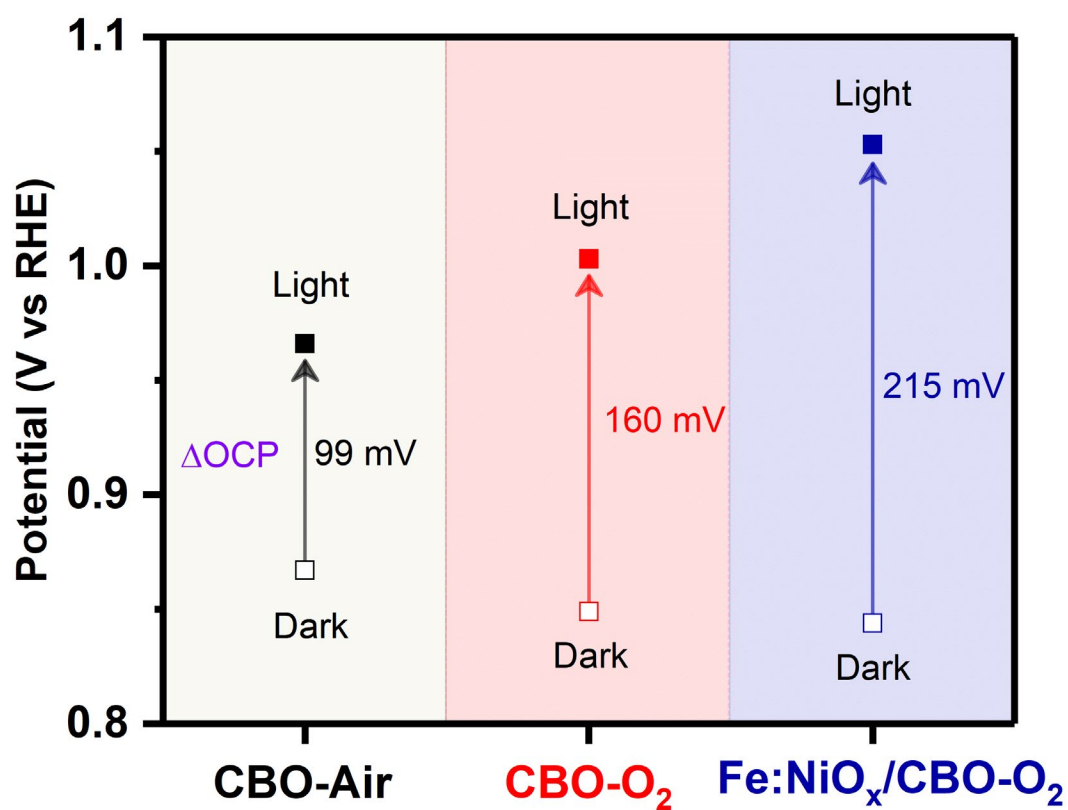

**Figure S25.** The significant difference observed between the OCP measured photovoltages ( $\Delta\text{OCP}$ ) generated by CBO-Air and CBO-O<sub>2</sub> photoelectrode with/without Fe:NiO<sub>x</sub> hole transport layer.

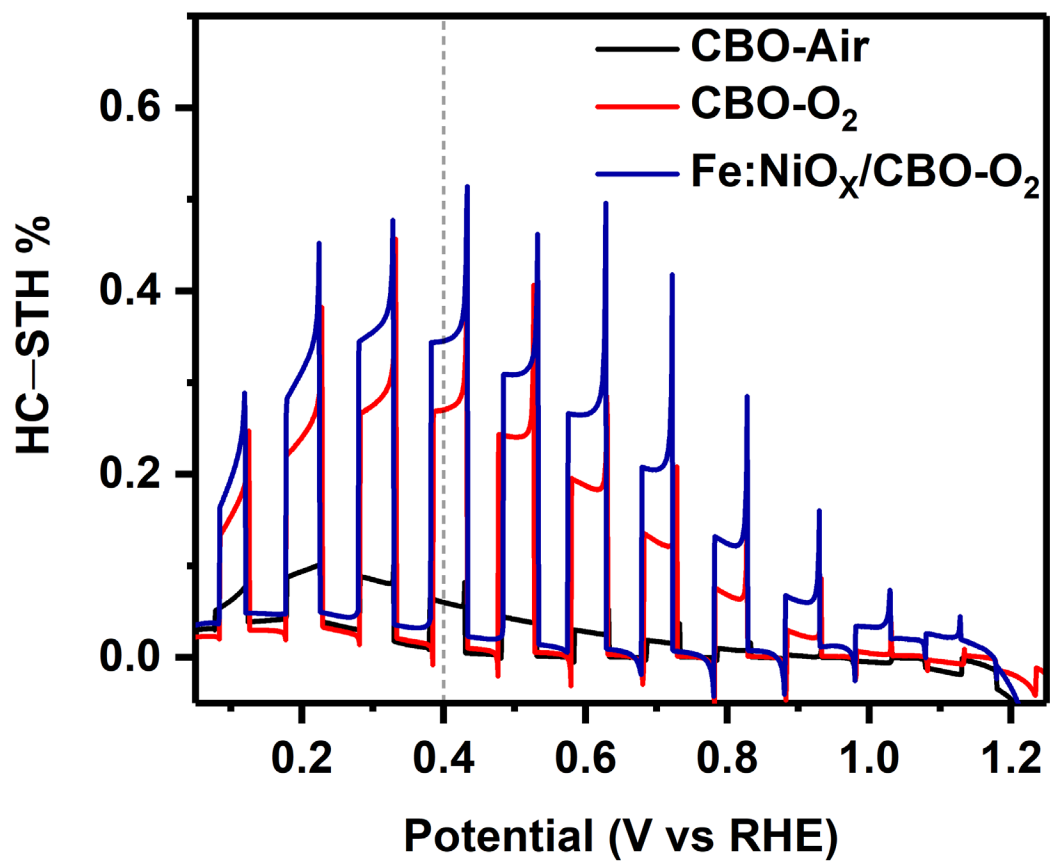

**Figure S26.** HC-STH efficiency calculations from LSV comparison curves with respect to applied potential for CBO-Air and CBO-O<sub>2</sub> photocathode with/without Fe:NiO<sub>x</sub> hole transport layer in 0.5 M Na<sub>2</sub>SO<sub>4</sub> (pH:6.6) electrolyte solution.

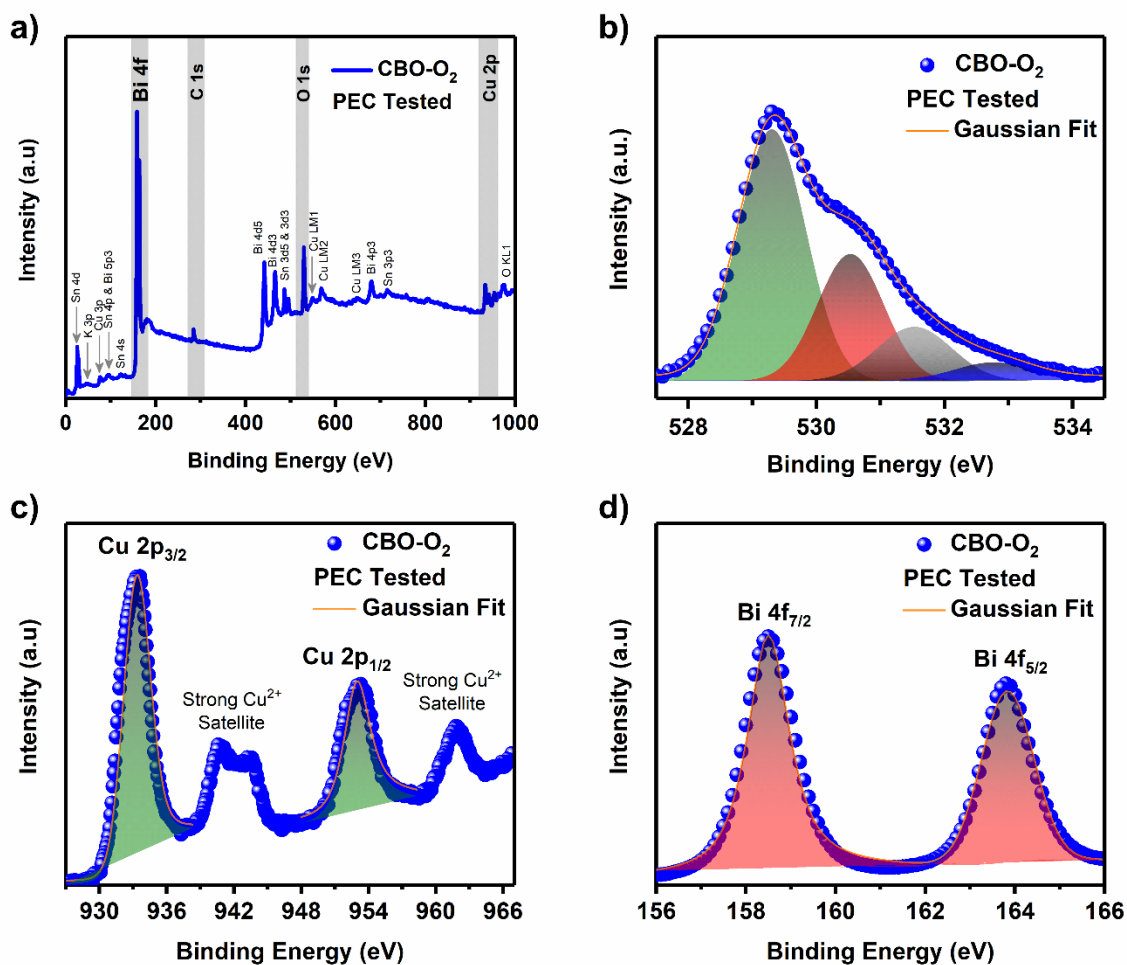

**Figure S27.** FTO/Fe:NiO<sub>x</sub>/CBO-O<sub>2</sub> photocathode after PEC experiments tested (without scavenger). a) XPS survey spectrum and (b-d) deconvoluted XPS of O 1s, c) Cu 2p, and d) Bi 4f core-level spectrum.

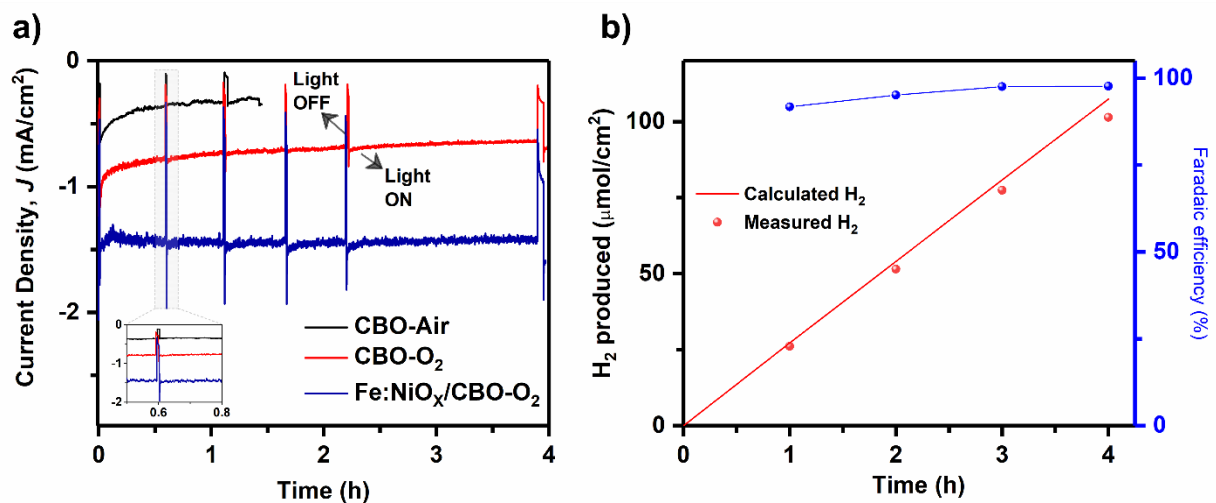

**Figure S28.** (a) Photocurrent density measurements for CBO photocathodes at 0.2 V<sub>RHE</sub> in 0.5 M Na<sub>2</sub>SO<sub>4</sub> aqueous solutions with respect to time. Inset show chopped light response at about 30 min. (b) Amount of hydrogen gas evolved under 1 sun light illumination with respect time using a Fe:NiO<sub>x</sub>/CBO-O<sub>2</sub> with introduced protecting layer photocathode. The theoretical and experimental values represent the expected and observed amount of H<sub>2</sub> produced.

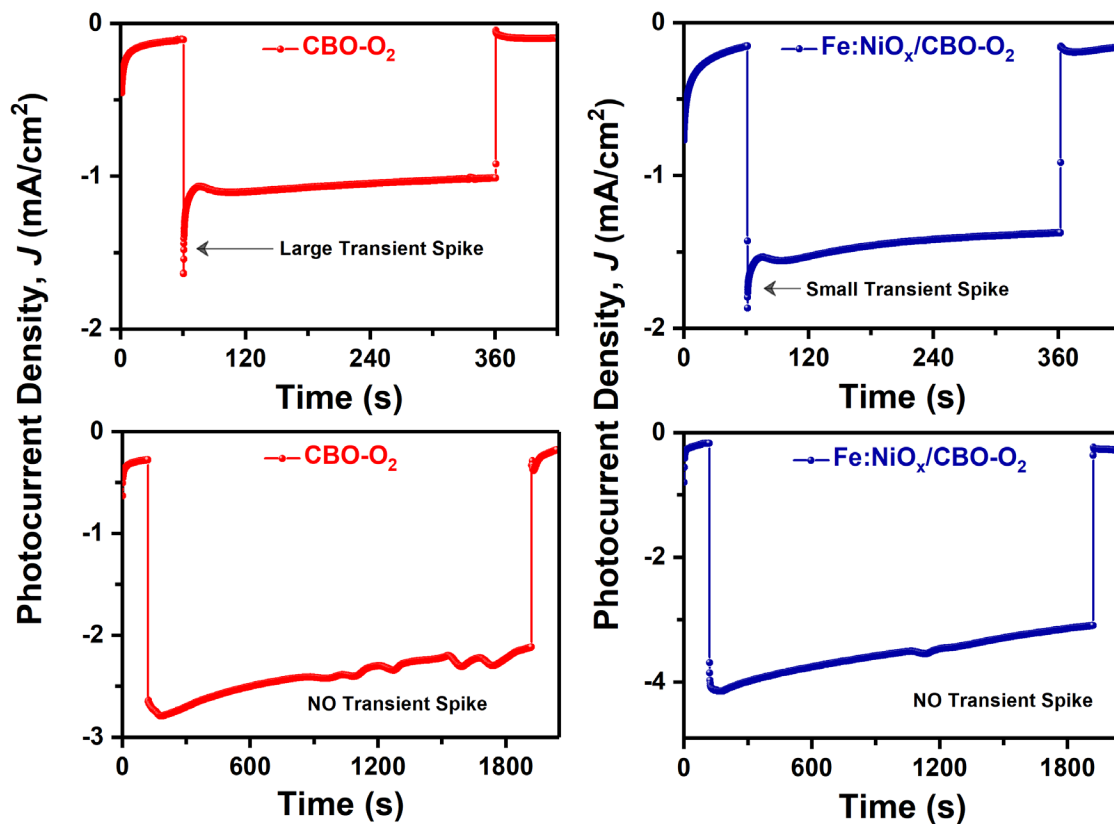

**Figure S29.** Transient photocurrent spike difference between 0.5 M Na<sub>2</sub>SO<sub>4</sub> aqueous (top) with applied potential is 0.2 V<sub>RHE</sub> and addition of 0.2 M K<sub>2</sub>S<sub>2</sub>O<sub>8</sub> electron scavenger (bottom) at 0.4 V<sub>RHE</sub> applied potential.

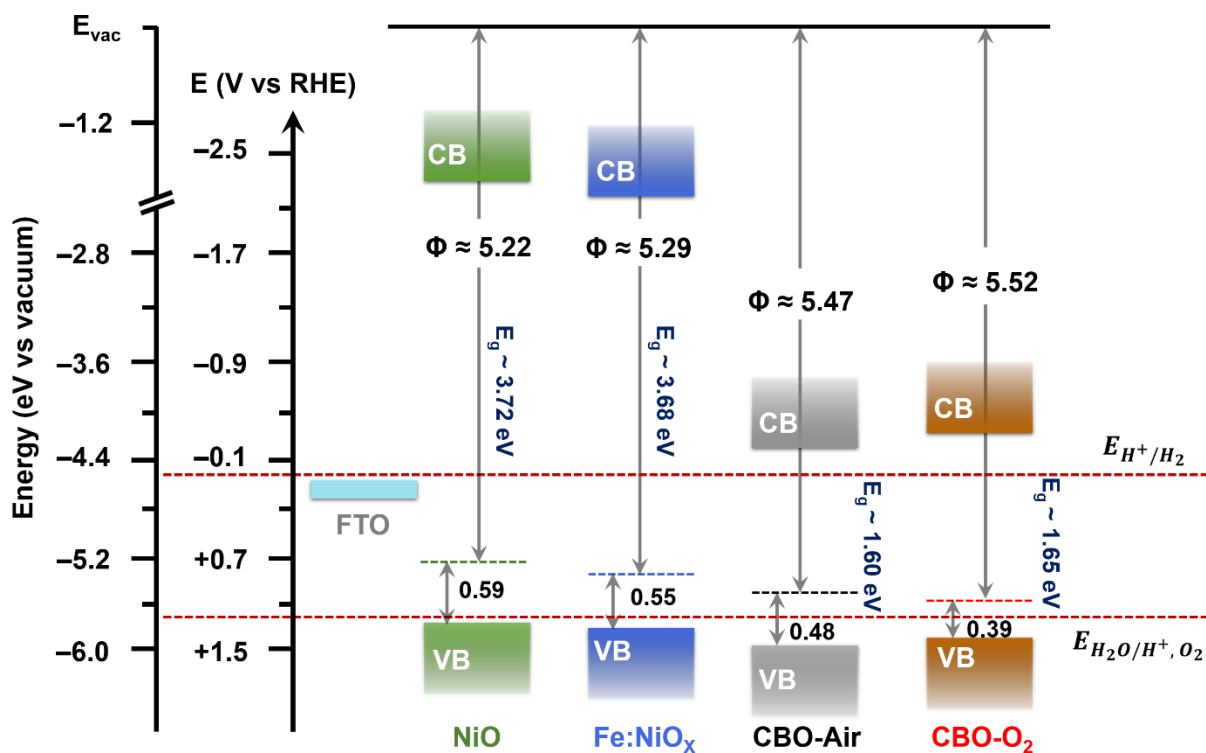

**Figure S30.** Schematic illustration of estimated energy band structure, composing of work functions,  $E_F$ ,  $E_F-E_V$ , VBM, CBM, and band-gap in the vacuum energy level scale and potential vs. RHE scale, of the bare NiO, Fe-doped NiO<sub>x</sub> HTLs, CBO-Air, and CBO-O<sub>2</sub> photoelectrodes deduced from the UPS and absorption data. For comparison, FTO flat-band potentials is included.

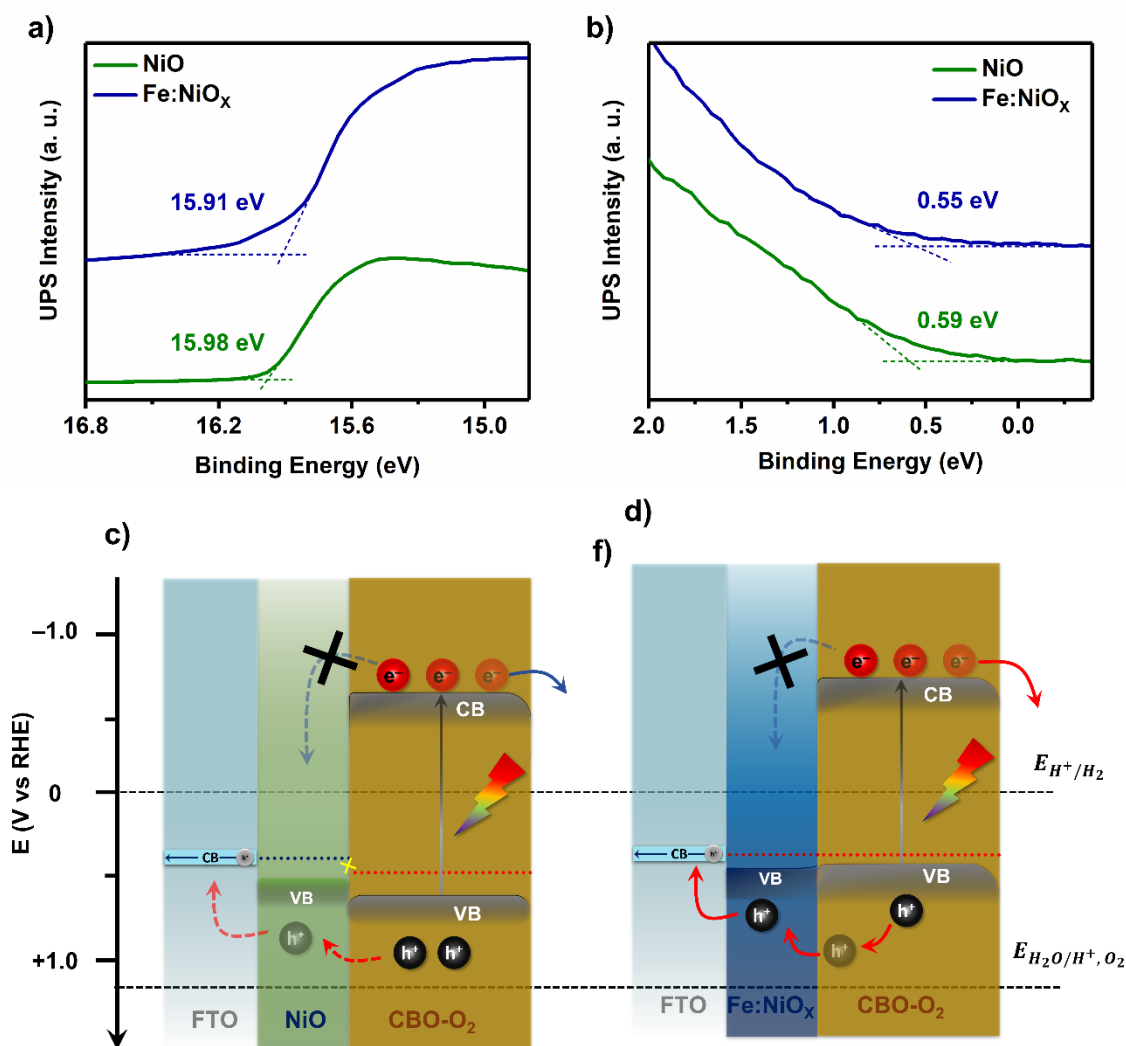

**Figure S31.** UPS curves for the bare NiO and Fe:NiO<sub>x</sub> hole-transport layers: (a)  $E_{\text{cutoff}}$  and (b)  $E_{\text{edge}}$  obtained from the He-I radiation at 21.2 eV. (c) Schematic energy band diagram showing the difference between (c) bare NiO and (d) Fe-doped NiO<sub>x</sub> HTL effect under the CBO-O<sub>2</sub> photocathode with respect to FTO after the equilibrium.

**Table S1.** Estimated flat band potentials and acceptor density for carrier-gas flow annealed CBO photoelectrodes measured under dark conditions with 0.5 M of Na<sub>2</sub>SO<sub>4</sub> aqueous solutions.

| CBO carrier gas ratio           | Flat-band potential [ $\phi_{FB}$ ] V <sub>RHE</sub> | Acceptor density [ $N_A$ ] cm <sup>-3</sup> |
|---------------------------------|------------------------------------------------------|---------------------------------------------|
| CBO-Air (Furnace) <sup>a</sup>  | 1.176                                                | $3.91 \times 10^{18}$                       |
| N/O~4 <sup>b</sup>              | 1.180                                                | $4.03 \times 10^{18}$                       |
| N/O~2                           | 1.189                                                | $8.90 \times 10^{19}$                       |
| N/O~1                           | 1.194                                                | $2.12 \times 10^{20}$                       |
| CBO-O <sub>2</sub> <sup>c</sup> | 1.203                                                | $1.10 \times 10^{21}$                       |

Considering approximately similar environment in <sup>a</sup>muffle furnace and <sup>b</sup>tube furnace. <sup>c</sup>working pressure recorded as 0.25 torr under continuous flow of pure O<sub>2</sub> during heat treatment.

**Table S2.** XPS O 1s deconvoluted peak position and proportion of resolved lattice oxygen (O<sup>2-</sup>) bound to Cu<sup>2+</sup> and Bi<sup>3+</sup> components as well as Oxygen vacancies, in CBO films.

| Electrode                          | Binding Energy (eV) |                  | Relative Amount [at.%.] |                  |                             |                                              |       |
|------------------------------------|---------------------|------------------|-------------------------|------------------|-----------------------------|----------------------------------------------|-------|
|                                    | Cu <sup>2+</sup>    | Bi <sup>3+</sup> | Cu <sup>2+</sup>        | Bi <sup>3+</sup> | V <sub>O</sub> <sup>a</sup> | OH <sup>-</sup> <sub>surf</sub> <sup>b</sup> | Cu/Bi |
| Unannealed                         | 529.3               | 530.4            | 87.6                    | 8.0              | 2.8                         | 1.6                                          | 11    |
| Air without K <sup>+</sup>         | 529.3               | 530.4            | 79.8                    | 8.2              | 10.2                        | 1.8                                          | 9.8   |
| CBO-Air<br>(Furnace)               | 529.3               | 530.5            | 68.5                    | 20.4             | 8.2                         | 3.0                                          | 3.4   |
| N/O~4                              | 529.3               | 530.5            | 70.5                    | 20.8             | 7.3                         | 1.4                                          | 3.4   |
| N/O~2                              | 529.4               | 530.5            | 70.0                    | 22.9             | 6.2                         | 1.0                                          | 3.1   |
| N/O~1                              | 529.4               | 530.5            | 67.8                    | 26.8             | 4.6                         | 0.8                                          | 2.5   |
| CBO-O <sub>2</sub>                 | 529.4               | 530.5            | 65.0                    | 29.8             | 4.5                         | 0.7                                          | 2.2   |
| CBO-O <sub>2</sub><br>(PEC tested) | 529.4               | 530.5            | 62.6                    | 28.4             | 6.3                         | 2.8                                          | 2.2   |

<sup>a</sup>surface oxygen vacancies and <sup>b</sup> OH<sup>-</sup> and C-O groups adsorbed on the surface.

**Table S3.** Elemental analysis (atomic. %) of prepared CBO films surfaces obtained from XPS.

| Electrode                       | Cu   | Bi   | O    | K   | C    | Cu/Bi |
|---------------------------------|------|------|------|-----|------|-------|
| Unannealed                      | 11.4 | 15.7 | 43.9 | 5.5 | 23.6 | 0.7   |
| Air without K <sup>+</sup>      | 3.1  | 5.4  | 71.2 | --  | 20.3 | 0.6   |
| CBO-Air (Furnace)               | 11.5 | 13.4 | 50.8 | --  | 24.3 | 0.9   |
| N/O~4                           | 11.5 | 13.7 | 53.7 | --  | 21.1 | 0.8   |
| N/O~2                           | 10.9 | 14.3 | 53.2 | --  | 21.6 | 0.8   |
| N/O~1                           | 9.8  | 14.4 | 53.3 | --  | 22.5 | 0.7   |
| CBO-O <sub>2</sub>              | 9.0  | 15.1 | 54.2 | --  | 21.7 | 0.6   |
| CBO-O <sub>2</sub> (PEC tested) | 9.3  | 15.3 | 53.2 | --  | 22.2 | 0.6   |

**Table S4.** Atomic ratio percentage obtained from EDS mapping for Cu-to-Bi components in prepared CBO electrodes.

| Element | CBO-Air | CBO-O <sub>2</sub> |
|---------|---------|--------------------|
| Cu      | 12.9    | 9.2                |
| Bi      | 28.0    | 28.2               |
| O       | 59.1    | 62.6               |

**Table S5.** Comparison of atomic ratio percentage obtained from XPS spectrum and EDS mapping for Cu-to-Bi components in prepared CBO-air and CBO-O<sub>2</sub> electrodes.

| Electrode          | XPS Atomic% |      |       | EDS Atomic% |      |       |
|--------------------|-------------|------|-------|-------------|------|-------|
|                    | Cu          | Bi   | Cu/Bi | Cu          | Bi   | Cu/Bi |
| CBO-Air            | 11.5        | 13.4 | 0.9   | 12.9        | 28.0 | 0.5   |
| CBO-O <sub>2</sub> | 9.0         | 15.1 | 0.6   | 9.2         | 28.2 | 0.3   |

**Table S6.** Series ( $R_s$ ) and charge-transfer ( $R_{ct}$ ) resistance for the CBO- $O_2$  and Fe:NiO<sub>x</sub>/CBO- $O_2$  photocathodes comparison with CBO-Air at 0.4 V<sub>RHE</sub> in 0.5 M Na<sub>2</sub>SO<sub>4</sub> (pH~ 6.6).

| Photocathode                    | $R_s$ ( $\Omega \cdot \text{cm}^2$ ) | $R_{ct}$ ( $\Omega \cdot \text{cm}^2$ ) |
|---------------------------------|--------------------------------------|-----------------------------------------|
| CBO-Air                         | 70.0                                 | 4606.2                                  |
| CBO- $O_2$                      | 55.0                                 | 3148.3                                  |
| NiO/CBO- $O_2$                  | 44.3                                 | 2751.0                                  |
| Fe:NiO <sub>x</sub> /CBO- $O_2$ | 26.8                                 | 612.8                                   |

**Table S7.** Summary of recent literature on CBO based photocathodes at required potential photocurrent density for water reduction in the neutral electrolyte solution. \*The photocurrent values were roughly read from LSV curves in the corresponding literature.

| Photocathode Structure                                  | Preparation Method                     | Heat-Treatment                                       | Electrolyte type                                 | pH   | Photocurrent Density at 0.2 V <sub>RHE</sub> [mA·cm <sup>-2</sup> ] | Ref.      |
|---------------------------------------------------------|----------------------------------------|------------------------------------------------------|--------------------------------------------------|------|---------------------------------------------------------------------|-----------|
| CBO-O <sub>2</sub>                                      | Spin-coating/ Pulsed-Electrodeposition | 450 °C at O <sub>2</sub> partial pressure (0.5 mBar) | 0.5 M Na <sub>2</sub> SO <sub>4</sub>            | 6.6  | -1.23                                                               | This work |
| Fe:NiO <sub>x</sub> /CBO-O <sub>2</sub>                 |                                        |                                                      |                                                  |      | -1.56                                                               |           |
| CuBi <sub>2</sub> O <sub>4</sub>                        | Drop-coating                           | 550 °C in Air Heating                                | 0.1 M Na <sub>2</sub> SO <sub>4</sub>            | 6.8  | -0.46                                                               | [S1]      |
| CuBi <sub>2</sub> O <sub>4</sub> /CuO                   | Chemical Bath and Doctor-blending      | 400 °C in Air Heating                                | 0.1 M Na <sub>2</sub> SO <sub>4</sub>            | 6.8  | -0.60                                                               | [S2]      |
| CuBi <sub>2</sub> O <sub>4</sub> /CuO                   | Solution Combustion/ Spray-coating     | Pre-heated 300 °C/350 °C Air heating                 | 0.1 M Na <sub>2</sub> SO <sub>4</sub>            | 6.8  | -0.30                                                               | [S3]      |
| CuO/CuBi <sub>2</sub> O <sub>4</sub> /Pt                | Drop-coating                           | 500 °C in Air Heating                                | 0.3 M K <sub>2</sub> SO <sub>4</sub> + 0.1 M PBS | 6.8  | -0.24                                                               | [S4]      |
| Au/CuBi <sub>2</sub> O <sub>4</sub> /Pt                 | Electrodeposition                      | 550 °C in Air Heating                                | 0.1 M Na <sub>2</sub> SO <sub>4</sub>            | 6.8  | -1.00                                                               | [S5]      |
| CuBi <sub>2</sub> O <sub>4</sub> /ZnSe/TiO <sub>2</sub> | Drop-coating                           | 450 °C in Air Heating                                | 0.3 M K <sub>2</sub> SO <sub>4</sub> + 0.2 M PBS | 6.65 | -0.60                                                               | [S6]      |
| CuBi <sub>2</sub> O <sub>4</sub> /Au/C                  | Drop-coating                           | 450 °C in Air Heating                                | 0.3 M K <sub>2</sub> SO <sub>4</sub> + 0.2 M PBS | 6.68 | -0.52                                                               | [S7]      |

|                                                                                       |                                             |                                                                                                                                             |                                                  |      |                             |       |
|---------------------------------------------------------------------------------------|---------------------------------------------|---------------------------------------------------------------------------------------------------------------------------------------------|--------------------------------------------------|------|-----------------------------|-------|
| CuBi <sub>2</sub> O <sub>4</sub> /Polythiophene                                       | Drop-coating                                | 450 °C in Air Heating                                                                                                                       | 0.3 M K <sub>2</sub> SO <sub>4</sub> + 0.2 M PBS | 6.66 | −0.51                       | [S8]  |
| CuBi <sub>2</sub> O <sub>4</sub> /BiVO <sub>4</sub>                                   | Electrodeposition                           | 500 °C in Air Heating                                                                                                                       | 0.1 M Na <sub>2</sub> SO <sub>4</sub>            | 6    | −0.48                       | [S9]  |
| CuBi <sub>2</sub> O <sub>4</sub> /rGO                                                 | Drop-coating/Spin-coating                   | 450 °C in Air Heating                                                                                                                       | 0.5 M Na <sub>2</sub> SO <sub>4</sub>            | 6.8  | −0.25                       | [S10] |
| Ag-CuBi <sub>2</sub> O <sub>4</sub> /NGQD                                             | Drop-coating                                | 550 °C in Air Heating                                                                                                                       | 0.5 M Na <sub>2</sub> SO <sub>4</sub>            | 6.6  | −0.08                       | [S11] |
| O <sub>V</sub> -CuBi <sub>2</sub> O <sub>4</sub> /Zn-CuBi <sub>2</sub> O <sub>4</sub> | Drop-coating                                | 550 °C in Air Heating                                                                                                                       | 0.3 M K <sub>2</sub> SO <sub>4</sub> + 0.2 M PBS | 6.65 | −0.64                       | [S12] |
| CuO/CuBi <sub>2</sub> O <sub>4</sub>                                                  | Electrodeposition                           | 450 °C in Air Heating                                                                                                                       | 0.5 M Na <sub>2</sub> SO <sub>4</sub>            | 7    | −0.80                       | [S13] |
| CuBi <sub>2</sub> O <sub>4</sub> /TiO <sub>2</sub>                                    | Electrodeposition/<br>Drop-casting          | 550 °C in Air (Bi <sub>2</sub> O <sub>3</sub> )/<br>550 °C in O <sub>2</sub> (Cu <sup>2+</sup> -Bi <sub>2</sub> O <sub>3</sub> )<br>Heating | 0.1 M Na <sub>2</sub> SO <sub>4</sub>            | 6.8  | −0.90                       | [S14] |
| NiO/CuBi <sub>2</sub> O <sub>4</sub>                                                  | Mechanochemical-<br>Pulsed Laser deposition | 800 °C in Air/PLD in O <sub>2</sub> partial<br>pressure                                                                                     | 0.1 M PBS                                        | 8.55 | −0.45 @ 0.4V <sub>RHE</sub> | [S15] |

---

\*PBS represents phosphate buffer solution.

**Table S8.** Summary of recent literature on CBO based photocathodes at required potential photocurrent density for water reduction in the neutral electrolyte solution with electron scavenger. \*The photocurrent values were roughly read from LSV curves in the corresponding literature.

| Photocathode Structure                                                  | Preparation Method                            | Heat-Treatment                                       | Electrolyte type                                | Electron Scavenger                            | pH   | Photocurrent Density at 0.4 V <sub>RHE</sub> [mA·cm <sup>-2</sup> ] | Ref.      |
|-------------------------------------------------------------------------|-----------------------------------------------|------------------------------------------------------|-------------------------------------------------|-----------------------------------------------|------|---------------------------------------------------------------------|-----------|
| CBO-O <sub>2</sub><br>Fe:NiO <sub>x</sub> /CBO-O <sub>2</sub>           | Spin-coating/Pulsed-Electrodeposition         | 450 °C at O <sub>2</sub> partial pressure            | 0.5 M Na <sub>2</sub> SO <sub>4</sub>           | K <sub>2</sub> S <sub>2</sub> O <sub>8</sub>  | 7    | -2.89<br>-4.50                                                      | This work |
| NiO/CuBi <sub>2</sub> O <sub>4</sub>                                    | Mechanochemical-Pulsed Laser deposition       | 800 °C in Air/PLD in O <sub>2</sub> partial pressure | 0.1 M PBS                                       | H <sub>2</sub> O <sub>2</sub>                 | 8.55 | -1.5                                                                | [S15]     |
| CuBi <sub>2</sub> O <sub>4</sub><br>(Bi:Cu=1.5)                         | Spin-coating                                  | 550 °C in Air Heating                                | 0.1 M KHCO <sub>3</sub>                         | Na <sub>2</sub> S <sub>2</sub> O <sub>8</sub> | 8.2  | -1.21 @ 0.6 V <sub>RHE</sub>                                        | [S16]     |
| CuBi <sub>2</sub> O <sub>4</sub> /Cu <sub>1.5</sub> TiO <sub>2</sub>    | Co-sputtering                                 | 400 °C in Ar (86%) & O <sub>2</sub> (14%) Heating    | 0.1 M KHCO <sub>3</sub>                         | Na <sub>2</sub> S <sub>2</sub> O <sub>8</sub> | 8.2  | -1.4                                                                | [S17]     |
| CuBi <sub>2</sub> O <sub>4</sub>                                        | Spin-coating                                  | 450 °C in Air Heating                                | 0.3 M K <sub>2</sub> SO <sub>4</sub> +0.2 M PBS | H <sub>2</sub> O <sub>2</sub>                 | 6.65 | -3.90                                                               | [S18]     |
| Cu:NiO/CuBi <sub>2</sub> O <sub>4</sub>                                 | Electron-beam evaporation/<br>Spray-pyrolysis | Pre-heated 450 °C in Air                             | 0.3 M K <sub>2</sub> SO <sub>4</sub> +0.2 M PBS | H <sub>2</sub> O <sub>2</sub>                 | 6.65 | -4.40                                                               | [S19]     |
| Gradient CuBi <sub>2</sub> O <sub>4</sub> /<br>CdS/TiO <sub>2</sub> /Pt | Spray-pyrolysis                               | Pre-heated 450 °C in Air                             | 0.3 M K <sub>2</sub> SO <sub>4</sub> +0.2 M PBS | H <sub>2</sub> O <sub>2</sub>                 | 6.65 | -3.7                                                                | [S20]     |

\*PBS represents phosphate buffer solution.

## References

- [S1] J. Li, M. Griep, Y. Choi, D. Chu, *Chem. Commun.* 54 (2018) 3331–3334.
- [S2] R. Patil, S. Kelkar, R. Naphade, S. Ogale, *J. Mater. Chem. A* 2 (2014) 3661–3668.
- [S3] M.K. Hossain, G.F. Samu, K. Gandha, S. Santhanagopalan, J.P. Liu, C. Janáky, K. Rajeshwar, *J. Phys. Chem. C* 121 (2017) 8252–8261.
- [S4] H.S. Park, C.-Y. Lee, E. Reisner, *Phys. Chem. Chem. Phys.* 16 (2014) 22462–22465.
- [S5] D. Cao, N. Nasori, Z. Wang, Y. Mi, L. Wen, Y. Yang, S. Qu, Z. Wang, Y. Lei, *J. Mater. Chem. A* 4 (2016) 8995–9001.
- [S6] S. Wei, N. Xu, F. Li, X. Long, Y. Hu, L. Gao, C. Wang, S. Li, J. Ma, J. Jin, *ChemElectroChem* 6 (2019) 3367–3374.
- [S7] N. Xu, F. Li, L. Gao, H. Hu, Y. Hu, X. Long, J. Ma, J. Jin, *ACS Sustain. Chem. Eng.* 6 (2018) 7257–7264.
- [S8] N. Xu, F. Li, L. Gao, H. Hu, Y. Hu, X. Long, J. Ma, J. Jin, *Int. J. Hydrogen Energy* 43 (2018) 2064–2072.
- [S9] S. Liu, J. Zhou, Y. Lu, J. Su, *Sol. Energy Mater. Sol. Cells* 180 (2018) 123–129.
- [S10] A.K. Shah, T.K. Sahu, A. Banik, D. Gogoi, N.R. Peela, M. Qureshi, *Sustain. Energy Fuels* 3 (2019) 1554–1561.
- [S11] C. Ma, D.-K. Ma, W. Yu, W. Chen, S. Huang, *Appl. Surf. Sci.* 481 (2019) 661–668.
- [S12] S. Wei, C. Wang, X. Long, T. Wang, P. Wang, M. Zhang, S. Li, J. Ma, J. Jin, L. Wu, *Nanoscale* 12 (2020) 15193–15200.
- [S13] S. Pulipaka, N. Boni, G. Ummethala, P. Meduri, *J. Catal.* 387 (2020) 17–27.
- [S14] Q. Zhang, B. Zhai, Z. Lin, X. Zhao, P. Diao, *J. Phys. Chem. C* 125 (2021) 1890–1901.
- [S15] J. Lee, H. Yoon, S. Kim, S. Seo, J. Song, B.-U. Choi, S.Y. Choi, H. Park, S. Ryu, J. Oh, S. Lee, *Chem. Commun.* 55 (2019) 12447–12450.
- [S16] Z. Zhang, S.A. Lindley, R. Dhall, K. Bustillo, W. Han, E. Xie, J.K. Cooper, *ACS Appl. Energy Mater.* 2 (2019) 4111–4117.
- [S17] Z. Zhang, S.A. Lindley, D. Guevarra, K. Kan, A. Shinde, J.M. Gregoire, W. Han, E. Xie, J.A. Haber, J.K. Cooper, *Adv. Funct. Mater.* 30 (2020) 2000948.
- [S18] Y. Xu, J. Jian, F. Li, W. Liu, L. Jia, H. Wang, *J. Mater. Chem. A* 7 (2019) 21997–22004.

- [S19] A. Song, P. Plate, A. Chemseddine, F. Wang, F.F. Abdi, M. Wollgarten, R. van de Krol, S.P. Berglund, *J. Mater. Chem. A* 7 (2019) 9183–9194.
- [S20] F. Wang, W. Septina, A. Chemseddine, F.F. Abdi, D. Friedrich, P. Bogdanoff, R. van de Krol, S.D. Tilley, S.P. Berglund, *J. Am. Chem. Soc.* 139 (2017) 15094–15103.
